# Supplementary material for: Pseudocannabinoid H4CBD enhances lipid catabolism to reduce visceral adiposity and large adipocyte size in advanced metabolic syndrome
Source: Research Square preprint supplement (doi:10.21203/rs.3.rs-7274449/v1), 2025-08-19

**Western Blot Images**

The following are full uncropped Western blot images for Figure 7 (A).

**FATP5 (70 kDa)**


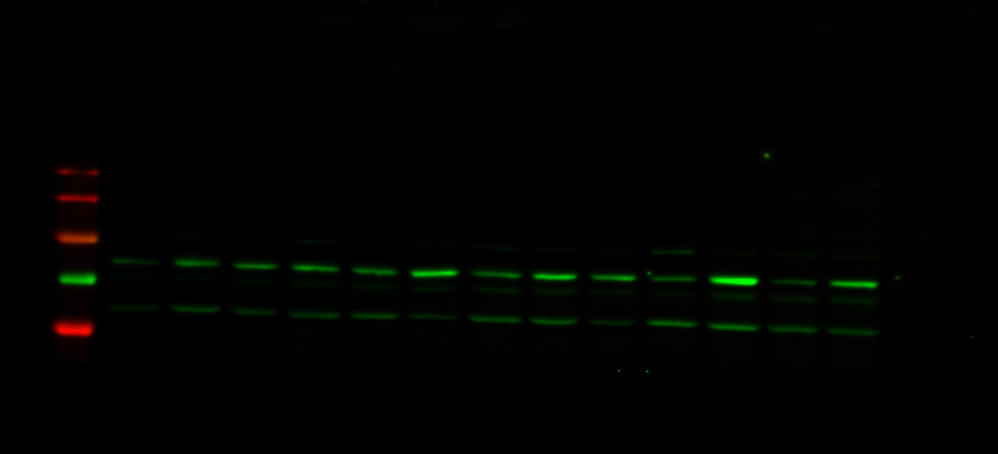

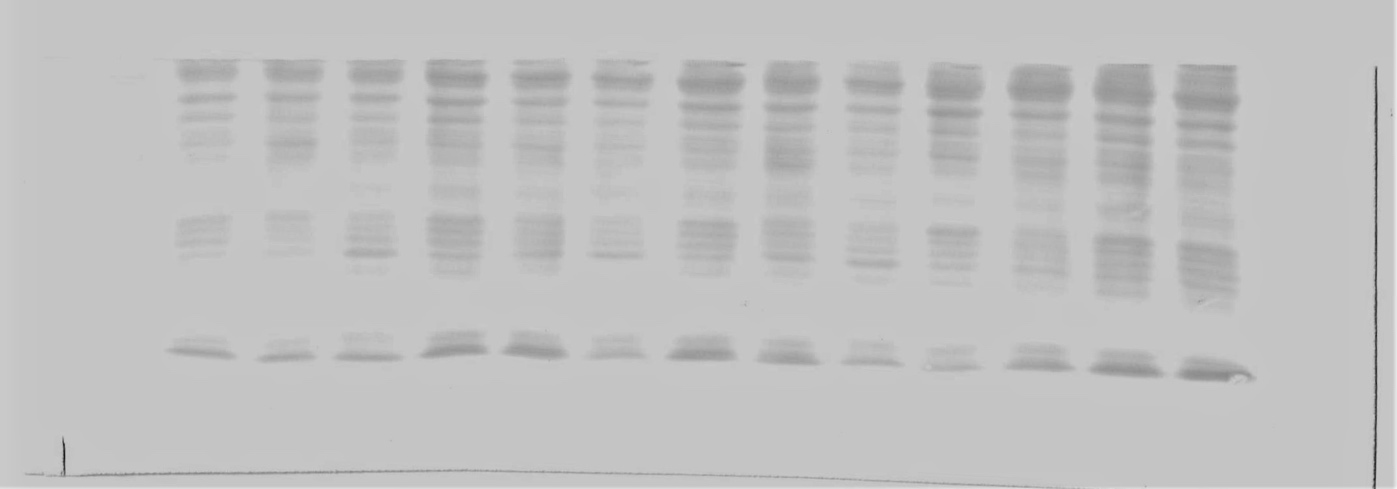


**FATP2 (70 kDa)**


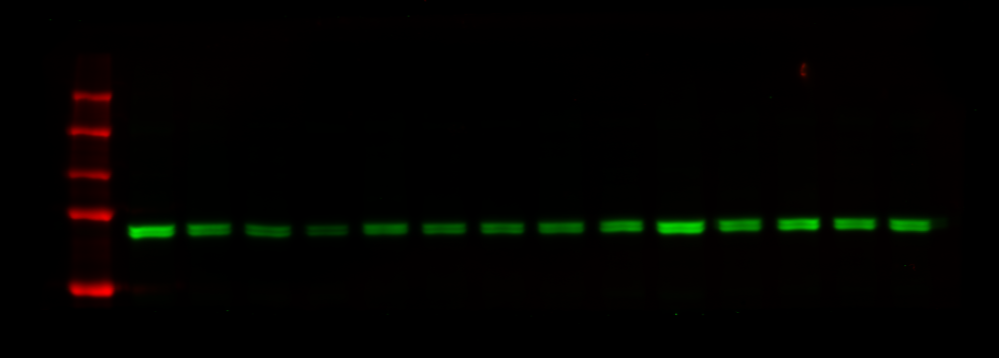

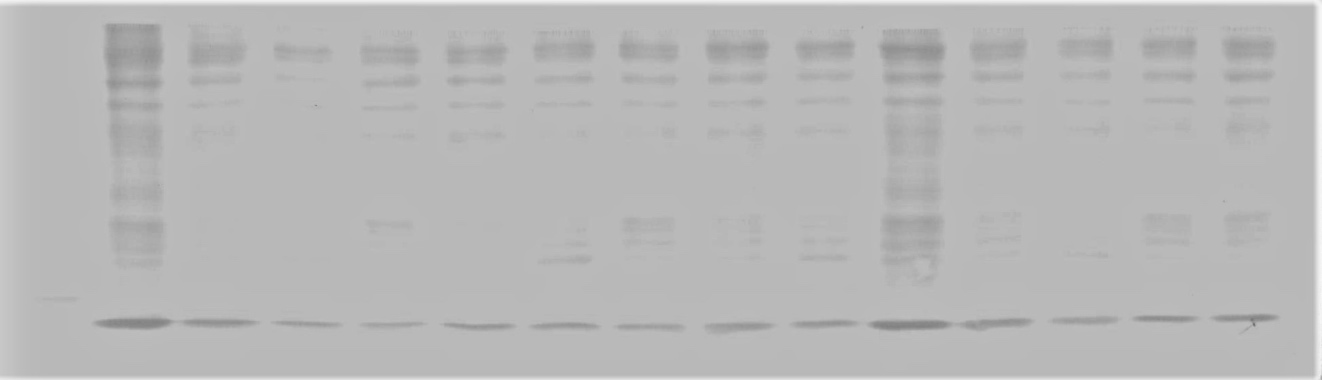


**CD36 (88 kDa)**


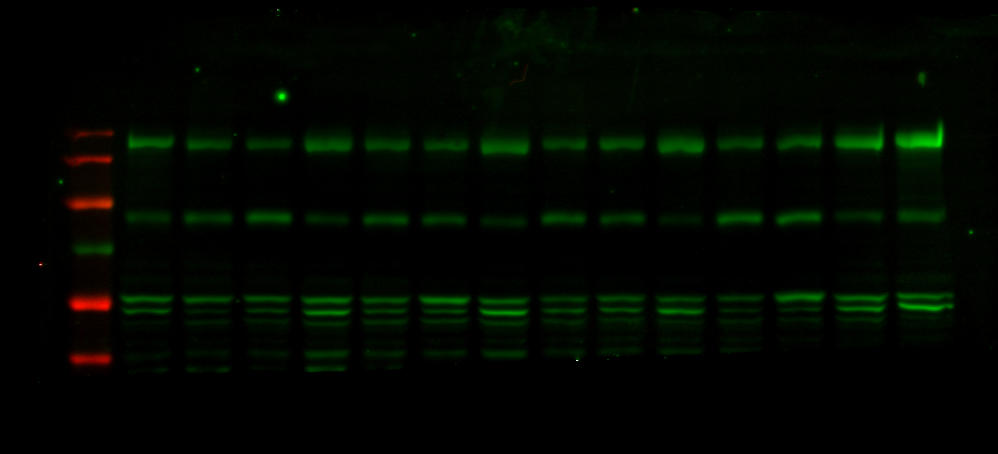

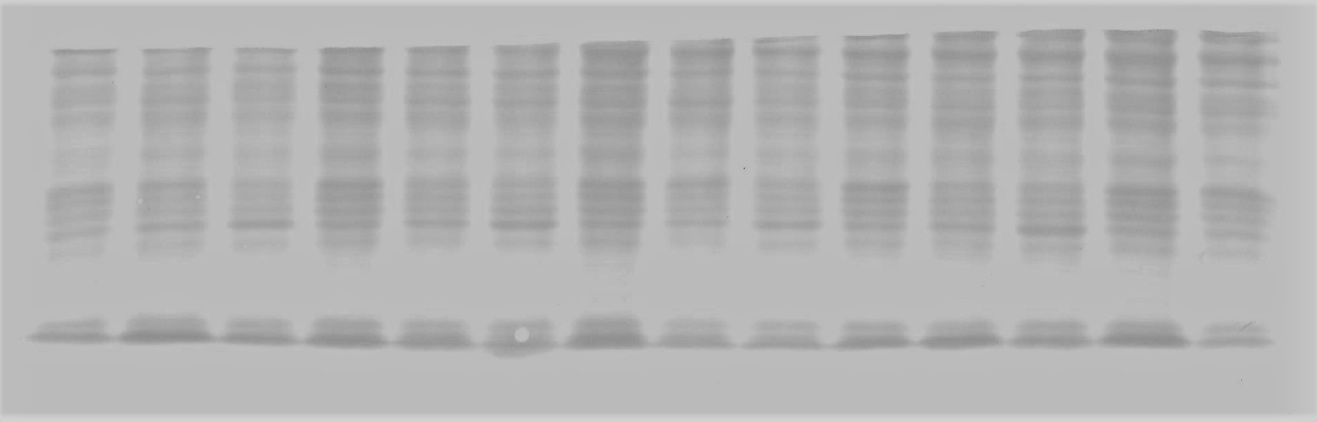

Supplement: Supplementary file 1 [file 358df8de9e17699262f2d867.docx]
